# Supplementary material for: Prefoldin 6 mediates longevity response from heat shock factor 1 to FOXO in C. elegans
Source: PubMed Central journal article supplement — Genes Dev. 2018 Dec 1;32(23-24):1562–75. doi: 10.1101/gad.317362.118 (PMC6295163; doi:10.1101/gad.317362.118), 2018-12-01
Supplement: supp_gad.317362.118_Supplemental_Table_S1_S7.pdf [file supp_gad.317362.118_Supplemental_Table_S1_S7.pdf]

## Supplementary Tables

Supplementary Table 1.

| Gene           | Description                                                                                          |
|----------------|------------------------------------------------------------------------------------------------------|
| <i>pfid-6*</i> | Putative prefoldin 6 subunit                                                                         |
| C54C8.3*       | An ortholog of human B3GALNT1 (beta-1,3-N-acetylgalactosaminyltransferase 1 (globoside blood group)) |
| <i>vps-4*</i>  | An ortholog of human VPS4A/B (vacuolar protein sorting 4 A/B)                                        |
| <i>ntl-2*</i>  | An ortholog of human CNOT2 (CCR4-NOT transcription complex subunit 2)                                |
| <i>fat-7*</i>  | Delta-9 fatty acid desaturase                                                                        |
| <i>inst-1</i>  | Integrator complex subunit 1 homolog                                                                 |
| T08G11.4       | An ortholog of human Tgs1 (trimethylguanosine synthase 1)                                            |
| <i>rae-1</i>   | An ortholog of human Rae1 (ribonucleic acid export 1)                                                |
| <i>ekl-4</i>   | An ortholog of human DMAP1 (DNA methyltransferase 1 associated protein 1)                            |
| <i>srpa-72</i> | An ortholog of human Srp72 (signal recognition particle 72)                                          |
| <i>ulp-2</i>   | An ortholog of human SENP6/7 (SUMO1/sentrin specific peptidase 6/7)                                  |
| <i>ulp-4</i>   | An ortholog of human SENP3-EIF4A1 (SENP3-EIF4A1 readthrough (NMD candidate))                         |
| <i>cap-2</i>   | Beta subunit of actin capping protein                                                                |

*hmg-1.2* An ortholog of members of the human canonical high mobility group family including HMGB2

C02B10.5 An ortholog of human PYGO1/2 (pygopus family PHD finger 1/2)

K07F5.14 Putative human ortholog of NOL8 (nucleolar protein 8)

*sec-6* An ortholog of human EXOC3L1 (exocyst complex component 3 like 1) and EXOC3 (exocyst complex component 3)

\*: RNAi targeting each gene decreased the lifespan of *daf-2* mutants compared to wild-type.

**Supplementary Table 2. Analysis of lifespan assay results related to Figure 1 and Figure**

**S1.**

| Strain                 | Mean lifespan $\pm$ s.e.m. (days) | 75th percentile | % change | Number of animals that died/total | <i>p</i> value vs. control | Figure in text  |
|------------------------|-----------------------------------|-----------------|----------|-----------------------------------|----------------------------|-----------------|
| WT/control RNAi        | 20.2 $\pm$ 0.6                    | 22              |          | 29/60                             |                            | Fig.1B,1D,1E,1F |
| WT/ <i>daf-16</i> RNAi | 18.6 $\pm$ 0.3                    | 20              | -8%      | 67/90                             | 0.0125                     |                 |
| WT/ <i>inst-1</i> RNAi | 16.1 $\pm$ 0.4                    | 18              | -20%     | 43/60                             | <0.0001                    |                 |
| WT/ <i>pfid-6</i> RNAi | 18.6 $\pm$ 0.5                    | 20              | -8%      | 36/90                             | 0.0244                     | Fig.1B          |
| WT/T08G11.4 RNAi       | 15.6 $\pm$ 0.2                    | 20              | -23%     | 48/90                             | <0.0001                    |                 |
| WT/ <i>rae-1</i> RNAi  | 16.8 $\pm$ 0.4                    | 20              | -17%     | 34/90                             | <0.0001                    |                 |
| WT/C54C8.3 RNAi        | 18.1 $\pm$ 0.5                    | 20              | -10%     | 38/60                             | 0.0036                     | Fig.1D          |
| WT/ <i>ekl-4</i> RNAi  | 19.1 $\pm$ 0.8                    | 24              | -5%      | 25/90                             | 0.2201                     |                 |

|                                           |          |    |                              |       |                                 |                     |
|-------------------------------------------|----------|----|------------------------------|-------|---------------------------------|---------------------|
| WT/ <i>vps-4</i> RNAi                     | 12.4±0.2 | 16 | -38%                         | 72/90 | <0.0001                         | Fig. 1E             |
| WT/ <i>srpa-72</i> RNAi                   | 21.1±0.6 | 24 | 5%                           | 67/90 | 0.2143                          |                     |
| WT/ <i>ntl-2</i> RNAi                     | 17.1±0.3 | 20 | -15%                         | 60/90 | <0.0001                         | Fig. 1F             |
| <i>daf-2(e1370)</i> /control RNAi@        | 44.6±1.1 | 48 | 121%                         | 40/75 | <0.0001                         | Fig. 1B, 1D, 1E, 1F |
| <i>daf-2(e1370)</i> / <i>daf-16</i> RNAi  | 22.3±0.6 | 25 | -50% <sup><i>daf-2</i></sup> | 20/75 | <0.0001 <sup><i>daf-2</i></sup> |                     |
| <i>daf-2(e1370)</i> / <i>hsf-1</i> RNAi   | 24.0±0.6 | 28 | -46% <sup><i>daf-2</i></sup> | 62/75 | <0.0001 <sup><i>daf-2</i></sup> |                     |
| <i>daf-2(e1370)</i> / <i>inst-1</i> RNAi  | 33.9±0.8 | 38 | -24% <sup><i>daf-2</i></sup> | 52/75 | <0.0001 <sup><i>daf-2</i></sup> |                     |
| <i>daf-2(e1370)</i> / <i>pfid-6</i> RNAi  | 32.1±1.3 | 38 | -28% <sup><i>daf-2</i></sup> | 9/75  | <0.0001 <sup><i>daf-2</i></sup> | Fig. 1B             |
| <i>daf-2(e1370)</i> /T08G11.4 RNAi        | 38.7±0.7 | 42 | -13% <sup><i>daf-2</i></sup> | 41/75 | <0.0001 <sup><i>daf-2</i></sup> |                     |
| <i>daf-2(e1370)</i> / <i>rae-1</i> RNAi   | 41.7±1.3 | 45 | -7% <sup><i>daf-2</i></sup>  | 24/75 | 0.0241 <sup><i>daf-2</i></sup>  |                     |
| <i>daf-2(e1370)</i> /C54C8.3 RNAi         | 28.8±0.9 | 31 | -36% <sup><i>daf-2</i></sup> | 28/75 | <0.0001 <sup><i>daf-2</i></sup> | Fig. 1D             |
| <i>daf-2(e1370)</i> / <i>ekl-4</i> RNAi   | 42.4±0.9 | 48 | -5% <sup><i>daf-2</i></sup>  | 38/75 | 0.0136 <sup><i>daf-2</i></sup>  |                     |
| <i>daf-2(e1370)</i> / <i>vps-4</i> RNAi   | 22.9±0.6 | 28 | -49% <sup><i>daf-2</i></sup> | 23/75 | <0.0001 <sup><i>daf-2</i></sup> | Fig. 1E             |
| <i>daf-2(e1370)</i> / <i>srpa-72</i> RNAi | 44.8±1.2 | 50 | 0% <sup><i>daf-2</i></sup>   | 37/75 | 0.9535 <sup><i>daf-2</i></sup>  |                     |
| <i>daf-2(e1370)</i> / <i>ntl-2</i> RNAi   | 30.9±0.9 | 35 | -31% <sup><i>daf-2</i></sup> | 14/75 | <0.0001 <sup><i>daf-2</i></sup> | Fig. 1F             |
| WT/control RNAi                           | 19.0±0.6 | 23 |                              | 42/90 |                                 |                     |
| WT/ <i>daf-16</i> RNAi                    | 17.9±0.5 | 21 | -5%                          | 60/90 | 0.1854                          |                     |
| WT/ <i>hsf-1</i> RNAi                     | 14.5±0.3 | 17 | -24%                         | 62/90 | <0.0001                         |                     |
| WT/ <i>ulp-2</i> RNAi                     | 19.2±0.7 | 21 | 1%                           | 36/90 | 0.7640                          |                     |
| WT/ <i>sec-6</i> RNAi                     | 17.8±0.6 | 21 | -6%                          | 41/88 | 0.1337                          |                     |
| WT/ <i>ulp-4</i> RNAi                     | 17.4±0.3 | 21 | -8%                          | 33/90 | 0.0139                          |                     |
| WT/ <i>cap-2</i> RNAi                     | 14.7±0.2 | 17 | -22%                         | 63/90 | <0.0001                         |                     |
| WT/ <i>hmg-1.2</i> RNAi                   | 15.4±0.4 | 19 | -19%                         | 36/60 | <0.0001                         |                     |

|                                           |          |    |                              |        |                                |  |
|-------------------------------------------|----------|----|------------------------------|--------|--------------------------------|--|
| WT/C02B10.5 RNAi                          | 19.4±0.6 | 23 | 2%                           | 35/60  | 0.6470                         |  |
| WT/K07F5.14 RNAi                          | 18.3±0.5 | 21 | -3%                          | 51/90  | 0.3263                         |  |
| WT/ <i>fat-7</i> RNAi                     | 16.4±0.4 | 19 | -14%                         | 66/90  | 0.0008                         |  |
| <i>daf-2(e1370)</i> /control RNAi@        | 44.6±1.1 | 48 | 135%                         | 40/75  | <0.0001                        |  |
| <i>daf-2(e1370)</i> / <i>ulp-2</i> RNAi   | 48.6±1.8 | 53 | 9% <sup><i>daf-2</i></sup>   | 23/75  | 0.0163 <sup><i>daf-2</i></sup> |  |
| <i>daf-2(e1370)</i> / <i>sec-6</i> RNAi   | 38.8±1.1 | 45 | -13% <sup><i>daf-2</i></sup> | 35/75  | 0.0001 <sup><i>daf-2</i></sup> |  |
| <i>daf-2(e1370)</i> / <i>ulp-4</i> RNAi   | 39.1±1.0 | 45 | -12% <sup><i>daf-2</i></sup> | 42/75  | 0.0004 <sup><i>daf-2</i></sup> |  |
| <i>daf-2(e1370)</i> / <i>cap-2</i> RNAi   | 36.3±1.4 | 42 | -19% <sup><i>daf-2</i></sup> | 35/75  | 0.0001 <sup><i>daf-2</i></sup> |  |
| <i>daf-2(e1370)</i> / <i>hmg-1.2</i> RNAi | 40.3±0.8 | 45 | -10% <sup><i>daf-2</i></sup> | 40/75  | 0.0001 <sup><i>daf-2</i></sup> |  |
| <i>daf-2(e1370)</i> /C02B10.5 RNAi        | 45.8±1.3 | 50 | 3% <sup><i>daf-2</i></sup>   | 45/75  | 0.1955 <sup><i>daf-2</i></sup> |  |
| <i>daf-2(e1370)</i> /K07F5.14 RNAi        | 43.9±1.7 | 50 | -2% <sup><i>daf-2</i></sup>  | 25/74  | 0.8712 <sup><i>daf-2</i></sup> |  |
| <i>daf-2(e1370)</i> / <i>fat-7</i> RNAi   | 33.4±2.6 | 45 | -25% <sup><i>daf-2</i></sup> | 19/75  | 0.0001 <sup><i>daf-2</i></sup> |  |
| WT/control RNAi                           | 20.5±0.6 | 24 |                              | 75/105 |                                |  |
| WT/ <i>hsf-1</i> RNAi                     | 16.2±0.3 | 20 | -21%                         | 87/105 | <0.0001                        |  |
| WT/ <i>inst-1</i> RNAi                    | 19.7±0.5 | 24 | -4%                          | 76/105 | 0.3378                         |  |
| WT/ <i>pfid-6</i> RNAi                    | 20.1±0.5 | 22 | -2%                          | 58/105 | 0.3019                         |  |
| WT/T08G11.4 RNAi                          | 17.8±0.3 | 20 | -13%                         | 75/104 | <0.0001                        |  |
| WT/ <i>rae-1</i> RNAi                     | 18.8±0.4 | 22 | -8%                          | 73/105 | 0.0039                         |  |
| WT/C54C8.3 RNAi                           | 17.2±0.3 | 20 | -16%                         | 69/105 | <0.0001                        |  |
| WT/ <i>ekl-4</i> RNAi                     | 18.6±0.4 | 22 | -9%                          | 71/99  | 0.0006                         |  |
| WT/ <i>vps-4</i> RNAi                     | 14.3±0.3 | 17 | -31%                         | 40/50  | <0.0001                        |  |
| WT/ <i>srpa-72</i> RNAi                   | 19.7±0.6 | 22 | -4%                          | 49/99  | 0.2088                         |  |
| <i>daf-2(e1370)</i> /control RNAi         | 48.3±1.6 | 60 | 136%                         | 45/75  | <0.0001                        |  |

|                                   |          |    |                              |        |                                 |        |
|-----------------------------------|----------|----|------------------------------|--------|---------------------------------|--------|
| <i>daf-2(e1370)/daf-16</i> RNAi   | 24.2±0.5 | 29 | -50% <sup><i>daf-2</i></sup> | 49/75  | <0.0001 <sup><i>daf-2</i></sup> |        |
| <i>daf-2(e1370)/hsf-1</i> RNAi    | 27.8±0.7 | 33 | -42% <sup><i>daf-2</i></sup> | 57/75  | <0.0001 <sup><i>daf-2</i></sup> |        |
| <i>daf-2(e1370)/inst-1</i> RNAi   | 42.3±1.0 | 52 | -12% <sup><i>daf-2</i></sup> | 70/75  | <0.0001 <sup><i>daf-2</i></sup> |        |
| <i>daf-2(e1370)/pfd-6</i> RNAi    | 41.6±0.9 | 49 | -14% <sup><i>daf-2</i></sup> | 65/75  | <0.0001 <sup><i>daf-2</i></sup> |        |
| <i>daf-2(e1370)/T08G11.4</i> RNAi | 44.6±0.8 | 49 | -8% <sup><i>daf-2</i></sup>  | 68/75  | 0.0001 <sup><i>daf-2</i></sup>  |        |
| <i>daf-2(e1370)/rae-1</i> RNAi    | 46.8±1.2 | 52 | -3% <sup><i>daf-2</i></sup>  | 60/75  | 0.1158 <sup><i>daf-2</i></sup>  |        |
| <i>daf-2(e1370)/C54C8.3</i> RNAi  | 29.6±0.7 | 33 | -39% <sup><i>daf-2</i></sup> | 54/75  | <0.0001 <sup><i>daf-2</i></sup> |        |
| <i>daf-2(e1370)/ekl-4</i> RNAi    | 46.1±1.5 | 52 | -5% <sup><i>daf-2</i></sup>  | 49/75  | 0.1303 <sup><i>daf-2</i></sup>  |        |
| <i>daf-2(e1370)/vps-4</i> RNAi    | 22.6±0.4 | 26 | -53% <sup><i>daf-2</i></sup> | 64/75  | <0.0001 <sup><i>daf-2</i></sup> |        |
| <i>daf-2(e1370)/srpa-72</i> RNAi  | 45.8±1.3 | 52 | -5% <sup><i>daf-2</i></sup>  | 64/75  | 0.0209 <sup><i>daf-2</i></sup>  |        |
| WT/control RNAi                   | 20.0±0.6 | 23 |                              | 69/105 |                                 | Fig.1C |
| WT/ <i>hsf-1</i> RNAi             | 17.6±0.3 | 21 | -12%                         | 88/105 | <0.0001                         |        |
| WT/ <i>ntl-2</i> RNAi             | 20.2±0.5 | 23 | 1%                           | 70/88  | 0.9101                          |        |
| WT/ <i>ulp-2</i> RNAi             | 20.5±0.6 | 23 | 2%                           | 43/73  | 0.9773                          |        |
| WT/ <i>sec-6</i> RNAi             | 22.5±0.6 | 27 | 12%                          | 61/105 | 0.0203                          |        |
| WT/ <i>ulp-4</i> RNAi             | 20.1±0.5 | 23 | 0%                           | 79/105 | 0.7294                          |        |
| WT/ <i>cap-2</i> RNAi             | 21.2±0.5 | 23 | 6%                           | 83/105 | 0.3609                          |        |
| WT/ <i>hmg-1.2</i> RNAi           | 18.9±0.4 | 21 | -6%                          | 65/101 | 0.0182                          |        |
| WT/C02B10.5 RNAi                  | 22.4±0.7 | 27 | 12%                          | 60/104 | 0.0204                          |        |
| WT/K07F5.14 RNAi                  | 19.3±0.4 | 21 | -4%                          | 70/105 | 0.0868                          |        |
| WT/ <i>fat-7</i> RNAi             | 18.7±0.4 | 21 | -7%                          | 77/100 | 0.0296                          | Fig.1C |
| <i>daf-2(e1370)/control</i> RNAi  | 47.1±1.5 | 52 | 135%                         | 39/50  | <0.0001                         | Fig.1C |

|                                       |          |    |                              |         |                                 |              |
|---------------------------------------|----------|----|------------------------------|---------|---------------------------------|--------------|
| <i>daf-2(e1370)/daf-16</i> RNAi       | 25.9±0.6 | 31 | -45% <sup><i>daf-2</i></sup> | 60/75   | <0.0001 <sup><i>daf-2</i></sup> |              |
| <i>daf-2(e1370)/hsf-1</i> RNAi        | 27.7±0.7 | 31 | -41% <sup><i>daf-2</i></sup> | 60/75   | <0.0001 <sup><i>daf-2</i></sup> |              |
| <i>daf-2(e1370)/ntl-2</i> RNAi        | 31.8±0.9 | 38 | -33% <sup><i>daf-2</i></sup> | 50/75   | <0.0001 <sup><i>daf-2</i></sup> |              |
| <i>daf-2(e1370)/ulp-2</i> RNAi        | 46.7±1.6 | 56 | -1% <sup><i>daf-2</i></sup>  | 62/75   | 0.3256 <sup><i>daf-2</i></sup>  |              |
| <i>daf-2(e1370)/sec-6</i> RNAi        | 47.0±1.2 | 49 | 0% <sup><i>daf-2</i></sup>   | 62/75   | 0.8945 <sup><i>daf-2</i></sup>  |              |
| <i>daf-2(e1370)/ulp-4</i> RNAi        | 43.8±1.1 | 49 | -7% <sup><i>daf-2</i></sup>  | 56/75   | 0.0243 <sup><i>daf-2</i></sup>  |              |
| <i>daf-2(e1370)/cap-2</i> RNAi        | 43.5±1.1 | 49 | -8% <sup><i>daf-2</i></sup>  | 69/75   | 0.0183 <sup><i>daf-2</i></sup>  |              |
| <i>daf-2(e1370)/hmg-1.2</i> RNAi      | 42.4±1.2 | 49 | -10% <sup><i>daf-2</i></sup> | 51/75   | 0.0018 <sup><i>daf-2</i></sup>  |              |
| <i>daf-2(e1370)/C02B10.5</i> RNAi     | 46.8±1.5 | 56 | -1% <sup><i>daf-2</i></sup>  | 55/75   | 0.5308 <sup><i>daf-2</i></sup>  |              |
| <i>daf-2(e1370)/K07F5.14</i> RNAi     | 42.9±1.6 | 52 | -9% <sup><i>daf-2</i></sup>  | 58/75   | 0.4089 <sup><i>daf-2</i></sup>  |              |
| <i>daf-2(e1370)/fat-7</i> RNAi        | 37.6±1.9 | 49 | -19% <sup><i>daf-2</i></sup> | 49/75   | 0.0029 <sup><i>daf-2</i></sup>  | Fig.1C       |
| WT                                    | 23.5±0.9 | 30 |                              | 87/120  |                                 | Fig. S1B,S1D |
| <i>pfid-6(gk493446)</i>               | 21.9±0.7 | 26 | -7%                          | 85/120  | 0.0114                          |              |
| <i>fat-7(wa36)</i>                    | 27.2±0.9 | 34 | 16%                          | 105/150 | 0.0012                          | Fig. S1B     |
| <i>ntl-2(gk390728)</i>                | 23.9±0.6 | 29 | 1%                           | 120/150 | 0.7974                          | Fig. S1D     |
| <i>daf-2(e1370)</i>                   | 43.5±1.2 | 53 | 85%                          | 99/120  | <0.0001                         | Fig. S1B,S1D |
| <i>pfid-6(gk493446); daf-2(e1370)</i> | 30.1±1.0 | 41 | -31% <sup><i>daf-2</i></sup> | 89/120  | <0.0001 <sup><i>daf-2</i></sup> |              |
| <i>daf-2(e1370); fat-7(wa36)</i>      | 31.4±1.3 | 41 | -28% <sup><i>daf-2</i></sup> | 93/120  | <0.0001 <sup><i>daf-2</i></sup> | Fig. S1B     |
| <i>ntl-2(gk390728); daf-2(e1370)</i>  | 38.7±1.7 | 53 | -11% <sup><i>daf-2</i></sup> | 95/120  | 0.8200 <sup><i>daf-2</i></sup>  | Fig. S1D     |
| WT                                    | 25.2±0.6 | 24 |                              | 135/140 |                                 | Fig. S1A     |
| <i>pfid-6(gk493446)</i>               | 19.8±0.5 | 19 | -21%                         | 128/140 | <0.0001                         | Fig. S1A     |

|                                        |          |    |                              |         |                                 |          |
|----------------------------------------|----------|----|------------------------------|---------|---------------------------------|----------|
| <i>fat-7(wa36)</i>                     | 25.7±0.9 | 26 | 2%                           | 93/105  | 0.0607                          |          |
| <i>ntl-2(gk390728)</i>                 | 21.1±0.8 | 19 | -16%                         | 63/70   | <0.0001                         |          |
| <i>daf-2(e1370)</i>                    | 49.9±1.0 | 51 | 98%                          | 118/140 | <0.0001                         | Fig. S1A |
| <i>pfd-6(gk493446); daf-2(e1370)</i>   | 33.6±0.9 | 32 | -33% <sup><i>daf-2</i></sup> | 124/140 | <0.0001 <sup><i>daf-2</i></sup> | Fig. S1A |
| <i>daf-2(e1370); fat-7(wa36)</i>       | 46.6±1.3 | 48 | -7% <sup><i>daf-2</i></sup>  | 111/140 | 0.5324 <sup><i>daf-2</i></sup>  |          |
| <i>ntl-2(gk390728); daf-2(e1370)</i>   | 52.2±1.6 | 60 | 5% <sup><i>daf-2</i></sup>   | 121/140 | <0.0001 <sup><i>daf-2</i></sup> |          |
| WT                                     | 20.3±0.5 | 25 |                              | 114/120 |                                 | Fig. S1C |
| <i>C54C8.3(gk896531)</i>               | 21.0±0.5 | 24 | 4%                           | 118/150 | 0.1762                          | Fig. S1C |
| <i>daf-2(e1370)</i>                    | 41.5±1.5 | 55 | 105%                         | 97/120  | <0.0001                         | Fig. S1C |
| <i>C54C8.3(gk896531); daf-2(e1370)</i> | 37.7±1.2 | 50 | -9% <sup><i>daf-2</i></sup>  | 129/150 | 0.0013 <sup><i>daf-2</i></sup>  | Fig. S1C |
| WT                                     | 21.3±0.6 | 25 |                              | 93/120  |                                 |          |
| <i>C54C8.3(gk896531)</i>               | 21.5±0.6 | 26 | 1%                           | 111/150 | 0.6291                          |          |
| <i>daf-2(e1370)</i>                    | 49.6±1.6 | 64 | 132%                         | 97/120  | <0.0001                         |          |
| <i>C54C8.3(gk896531); daf-2(e1370)</i> | 41.7±1.4 | 58 | -16% <sup><i>daf-2</i></sup> | 119/150 | <0.0001 <sup><i>daf-2</i></sup> |          |

Lifespan data within solid lines are the same experimental sets.

@: These lifespan results are from the same trials, but written in tables twice for different comparisons.

*p* values were calculated within the sets by using the log-rank (Mantel-Cox) method.

Percent (%) changes and *p* values were calculated with each control that is located in the first row within the solid line. The other comparisons used for calculating % changes and *p* values were indicated as superscripts.

Number of animals that died indicates the number of worms that counted as dead, and total indicates the number of worms that were initially used for our lifespan assays, including censored worms.

**Supplementary Table 3. Analysis of lifespan assay results related to Figure 2 and Figure S2.**

| Strain                                                                                       | Mean lifespan $\pm$ s.e.m. (days) | 75th percentile | % change                     | Number of animals that died/total | <i>p</i> value vs. control      | Figure in text |
|----------------------------------------------------------------------------------------------|-----------------------------------|-----------------|------------------------------|-----------------------------------|---------------------------------|----------------|
| WT/control RNAi                                                                              | 17.9 $\pm$ 0.4                    | 22              |                              | 60/120                            |                                 | Fig. 2A        |
| <i>pf<math>\delta</math>-6(gk493446)</i> /control RNAi                                       | 18.1 $\pm$ 0.4                    | 22              | 1%                           | 84/120                            | 0.7028                          | Fig. 2A        |
| <i>pf<math>\delta</math>-6(gk493446)</i> / <i>pf<math>\delta</math>-6</i> RNAi               | 17.8 $\pm$ 0.4                    | 22              | 0%                           | 81/120                            | 0.9826                          | Fig. 2A        |
| <i>daf-2(e1370)</i> /control RNAi                                                            | 49.6 $\pm$ 0.9                    | 54              | 178%                         | 67/120                            | <0.0001                         | Fig. 2A        |
| <i>pf<math>\delta</math>-6(gk493446); daf-2(e1370)</i> /control RNAi                         | 30.5 $\pm$ 0.7                    | 36              | -30% <sup><i>daf-2</i></sup> | 80/120                            | <0.0001 <sup><i>daf-2</i></sup> | Fig. 2A        |
| <i>pf<math>\delta</math>-6(gk493446); daf-2(e1370)</i> / <i>pf<math>\delta</math>-6</i> RNAi | 27.8 $\pm$ 0.6                    | 33              | -44% <sup><i>daf-2</i></sup> | 94/120                            | <0.0001 <sup><i>daf-2</i></sup> | Fig. 2A        |
| WT/control RNAi                                                                              | 19.2 $\pm$ 0.5                    | 22              |                              | 51/90                             |                                 |                |
| <i>pf<math>\delta</math>-6(gk493446)</i> /control RNAi                                       | 15.7 $\pm$ 0.4                    | 18              | -18%                         | 83/120                            | <0.0001                         |                |
| <i>pf<math>\delta</math>-6(gk493446)</i> / <i>pf<math>\delta</math>-6</i> RNAi               | 15.1 $\pm$ 0.4                    | 18              | -21%                         | 70/110                            | <0.0001                         |                |



|                                                                   |          |    |                              |         |                                 |         |
|-------------------------------------------------------------------|----------|----|------------------------------|---------|---------------------------------|---------|
| <i>daf-2(e1370)/control</i><br>RNAi                               | 45.6±1.2 | 53 | 137%                         | 62/120  | <0.0001                         |         |
| <i>pfid-6(gk493446); daf-2(e1370)/control</i><br>RNAi             | 36.7±0.9 | 44 | -16% <sup><i>daf-2</i></sup> | 96/120  | <0.0001 <sup><i>daf-2</i></sup> |         |
| <i>pfid-6(gk493446); daf-2(e1370)/pfid-6</i><br>RNAi              | 33.9±0.8 | 41 | -26% <sup><i>daf-2</i></sup> | 109/120 | <0.0001 <sup><i>daf-2</i></sup> |         |
| WT/control RNAi                                                   | 20.1±0.5 | 22 |                              | 52/120  |                                 |         |
| <i>pfid-6(gk493446)/pfid-6</i><br>RNAi                            | 17.9±0.3 | 23 | -11%                         | 85/120  | <0.0001                         |         |
| <i>daf-2(e1370)/control</i><br>RNAi                               | 47.7±1.1 | 55 | 138%                         | 65/90   | <0.0001                         |         |
| <i>pfid-6(gk493446); daf-2(e1370)/pfid-6</i><br>RNAi              | 33.6±0.6 | 41 | -30% <sup><i>daf-2</i></sup> | 90/120  | <0.0001 <sup><i>daf-2</i></sup> |         |
| WT/control RNAi                                                   | 18.5±0.4 | 22 |                              | 70/120  |                                 |         |
| <i>pfid-6(gk493446)/pfid-6</i><br>RNAi                            | 18.2±0.3 | 21 | -2%                          | 93/120  | 0.7732                          |         |
| <i>daf-2(e1370)/control</i><br>RNAi                               | 48.1±1.1 | 58 | 159%                         | 107/120 | <0.0001                         |         |
| <i>pfid-6(gk493446); daf-2(e1370)/pfid-6</i><br>RNAi              | 42.1±0.9 | 48 | -12% <sup><i>daf-2</i></sup> | 96/120  | <0.0001 <sup><i>daf-2</i></sup> |         |
| WT/control RNAi<br>without FUDR                                   | 19.0±0.6 | 23 |                              | 67/140  |                                 | Fig. 2B |
| <i>pfid-6(gk493446)/pfid-6</i><br>RNAi without FUDR               | 16.5±0.5 | 18 | -13%                         | 73/138  | 0.0018                          | Fig. 2B |
| <i>daf-2(e1370)/control</i><br>RNAi without FUDR                  | 47.0±1.5 | 56 | 147%                         | 66/122  | <0.0001                         | Fig. 2B |
| <i>pfid-6(gk493446); daf-2(e1370)/pfid-6</i><br>RNAi without FUDR | 31.9±1.0 | 38 | -32% <sup><i>daf-2</i></sup> | 86/139  | <0.0001 <sup><i>daf-2</i></sup> | Fig. 2B |
| WT/control RNAi<br>without FUDR                                   | 18.6±0.7 | 23 |                              | 96/140  |                                 |         |

|                                                                 |          |    |                              |         |                                 |             |
|-----------------------------------------------------------------|----------|----|------------------------------|---------|---------------------------------|-------------|
| <i>pdf-6(gk493446)/pdf-6</i><br>RNAi without FUdR               | 18.6±0.6 | 23 | 0%                           | 100/140 | 0.7833                          |             |
| <i>daf-2(e1370)/control</i><br>RNAi without FUdR                | 46.9±1.9 | 60 | 153%                         | 58/140  | <0.0001                         |             |
| <i>pdf-6(gk493446); daf-2(e1370)/pdf-6</i><br>RNAi without FUdR | 32.0±0.7 | 38 | -32% <sup><i>daf-2</i></sup> | 103/140 | <0.0001 <sup><i>daf-2</i></sup> |             |
| WT/control RNAi                                                 | 18.6±0.5 | 21 |                              | 48/60   |                                 | Fig. 2C-E,G |
| WT/ <i>pdf-6</i> RNAi                                           | 16.6±0.5 | 19 | -11%                         | 81/90   | 0.0646                          | Fig. 2C-E,G |
| <i>osm-5(p813)/control</i><br>RNAi                              | 34.9±1.5 | 46 | 45%                          | 36/90   | <0.0001                         | Fig. 2C     |
| <i>osm-5(p813)/pdf-6</i><br>RNAi                                | 29.6±1.1 | 35 | 10% <sup><i>osm-5</i></sup>  | 43/97   | 0.0866 <sup><i>osm-5</i></sup>  | Fig. 2C     |
| <i>osm-5(p813)/control</i><br>RNAi                              | 28.4±1.1 | 32 | 53%                          | 48/60   | <0.0001                         |             |
| <i>osm-5(p813)/pdf-6</i><br>RNAi                                | 23.8±0.9 | 27 | -16% <sup><i>osm-5</i></sup> | 35/115  | 0.0027 <sup><i>osm-5</i></sup>  |             |
| <i>eat-2(ad1116)/control</i><br>RNAi                            | 21.0±0.7 | 26 | 13%                          | 32/90   | 0.0048                          | Fig. 2D     |
| <i>eat-2(ad1116)/pdf-6</i><br>RNAi                              | 24.7±0.9 | 29 | 18% <sup><i>eat-2</i></sup>  | 29/90   | 0.0036 <sup><i>eat-2</i></sup>  | Fig. 2D     |
| <i>isp-1(qm150)/control</i><br>RNAi                             | 31.1±1.2 | 42 | 67%                          | 61/75   | <0.0001                         | Fig. 2E     |
| <i>isp-1(qm150)/pdf-6</i><br>RNAi                               | 30.6±1.0 | 36 | -2% <sup><i>isp-1</i></sup>  | 59/75   | 0.2331 <sup><i>isp-1</i></sup>  | Fig. 2E     |
| <i>vhl-1(ok161)/control</i><br>RNAi                             | 24.1±0.7 | 28 | 30%                          | 40/75   | <0.0001                         | Fig. 2G     |
| <i>vhl-1(ok161)/pdf-6</i> RNAi                                  | 25.7±0.6 | 28 | 7% <sup><i>vhl-1</i></sup>   | 39/50   | 0.1415 <sup><i>vhl-1</i></sup>  | Fig. 2G     |
| WT/control RNAi                                                 | 23.4±0.4 | 27 |                              | 88/90   |                                 |             |
| WT/ <i>pdf-6</i> RNAi                                           | 22.4±0.5 | 25 | -4%                          | 70/91   | 0.6485                          |             |

|                                       |          |    |                              |         |                                |         |
|---------------------------------------|----------|----|------------------------------|---------|--------------------------------|---------|
| <i>osm-5(p813)/control</i><br>RNAi    | 30.1±1.5 | 41 | 29%                          | 37/81   | <0.0001                        |         |
| <i>osm-5(p813)/pfd-6</i><br>RNAi      | 24.0±1.1 | 29 | -20% <sup><i>osm-5</i></sup> | 39/90   | 0.0019 <sup><i>osm-5</i></sup> |         |
| <i>eat-2(ad1116)/control</i><br>RNAi  | 24.5±0.8 | 30 | 10%                          | 38/70   | 0.0116                         |         |
| <i>eat-2(ad1116)/pfd-6</i><br>RNAi    | 30.8±0.8 | 35 | 20% <sup><i>eat-2</i></sup>  | 54/75   | 0.0020 <sup><i>eat-2</i></sup> |         |
| <i>isp-1(qm150)/control</i><br>RNAi   | 31.0±1.3 | 38 | 33%                          | 74/75   | <0.0001                        |         |
| <i>isp-1(qm150)/pfd-6</i><br>RNAi     | 29.9±1.3 | 38 | -4% <sup><i>isp-1</i></sup>  | 74/75   | 0.7607 <sup><i>isp-1</i></sup> |         |
| WT/control RNAi                       | 21.8±0.7 | 24 |                              | 51/89   |                                |         |
| WT/ <i>pfd-6</i> RNAi                 | 17.7±0.8 | 21 | -19%                         | 23/40   | 0.0003                         |         |
| <i>osm-5(p813)/control</i><br>RNAi    | 34.9±1.5 | 46 | 60%                          | 36/90   | <0.0001                        |         |
| <i>osm-5(p813)/pfd-6</i><br>RNAi      | 27.7±1.3 | 31 | -21% <sup><i>osm-5</i></sup> | 34/90   | 0.0002 <sup><i>osm-5</i></sup> |         |
| <i>vhl-1(ok161)/control</i><br>RNAi   | 23.5±0.6 | 28 | 7%                           | 63/90   | 0.1022                         |         |
| <i>vhl-1(ok161)/pfd-6</i> RNAi        | 26.3±0.5 | 30 | 12% <sup><i>vhl-1</i></sup>  | 80/90   | 0.0017 <sup><i>vhl-1</i></sup> |         |
| WT/control RNAi*                      | 16.7±0.3 | 21 |                              | 56/90   |                                | Fig. 2F |
| <i>pfd-6</i> RNAi*                    | 17.0±0.3 | 21 | 2%                           | 63/120  | 0.4988                         | Fig. 2F |
| <i>rsk-1(tm1714) pfd-6</i><br>RNAi*   | 23.1±0.5 | 26 | 38%                          | 100/120 | <0.0001                        | Fig. 2F |
| <i>rsk-1(tm1714)/control</i><br>RNAi* | 23.1±0.5 | 28 | 0% <sup><i>rsk-1</i></sup>   | 97/120  | 0.7448 <sup><i>rsk-1</i></sup> | Fig. 2F |
| WT/control RNAi*                      | 18.0±0.3 | 21 |                              | 86/120  |                                |         |
| <i>pfd-6</i> RNAi*                    | 17.8±0.3 | 21 | -1%                          | 80/120  | 0.5127                         |         |
| <i>rsk-1(tm1714)/control</i><br>RNAi* | 24.0±0.6 | 29 | 33%                          | 99/112  | <0.0001                        |         |

|                                                   |          |    |                   |        |                      |          |
|---------------------------------------------------|----------|----|-------------------|--------|----------------------|----------|
| <i>rsk-1(tm1714) pfd-6</i><br>RNAi*               | 23.9±0.6 | 29 | 0% <i>rsk-1</i>   | 77/104 | 0.9656 <i>rsk-1</i>  |          |
| WT                                                | 19.3±0.5 | 23 |                   | 88/120 |                      | Fig. 2H  |
| <i>pfd-6(gk493446)</i>                            | 19.3±0.5 | 23 | 0%                | 71/120 | 0.7921               | Fig. 2H  |
| <i>hsb-1(cg116)</i>                               | 21.4±0.7 | 24 | 11%               | 83/120 | 0.0098               | Fig. 2H  |
| <i>pfd-6(gk493446); hsb-1(cg116)</i>              | 24.7±0.7 | 31 | 15% <i>hsb-1</i>  | 97/120 | 0.0016 <i>hsb-1</i>  | Fig. 2H  |
| WT                                                | 19.3±0.4 | 22 |                   | 99/118 |                      |          |
| <i>pfd-6(gk493446)</i>                            | 18.9±0.4 | 22 | -2%               | 97/120 | 0.4007               |          |
| <i>hsb-1(cg116)</i>                               | 22.6±0.7 | 26 | 17%               | 84/120 | <0.0001              |          |
| <i>pfd-6(gk493446); hsb-1(cg116)</i>              | 25.7±0.5 | 29 | 14% <i>hsb-1</i>  | 96/120 | 0.0016 <i>hsb-1</i>  |          |
| WT/control RNAi<br>without FUdR                   | 21.9±0.6 | 25 |                   | 75/120 |                      | Fig. S2F |
| WT/ <i>pfd-6</i> RNAi without<br>FUdR             | 22.4±0.6 | 25 | 2%                | 71/120 | 0.5843               | Fig. S2F |
| <i>daf-2(e1370)/</i> control<br>RNAi without FUdR | 53.7±1.4 | 63 | 145%              | 67/120 | <0.0001              | Fig. S2F |
| <i>daf-2(e1370)/pfd-6</i> RNAi<br>without FUdR    | 35.0±0.7 | 40 | -35% <i>daf-2</i> | 72/120 | <0.0001 <i>daf-2</i> | Fig. S2F |
| WT/control RNAi<br>without FUdR                   | 18.1±0.5 | 23 |                   | 78/140 |                      |          |
| WT/ <i>pfd-6</i> RNAi without<br>FUdR             | 18.0±0.5 | 21 | -1%               | 67/140 | 0.6462               |          |
| <i>daf-2(e1370)/</i> control<br>RNAi without FUdR | 44.4±1.6 | 52 | 145%              | 44/120 | <0.0001              |          |
| <i>daf-2(e1370)/pfd-6</i> RNAi<br>without FUdR    | 32.2±0.8 | 38 | -27% <i>daf-2</i> | 42/120 | <0.0001 <i>daf-2</i> |          |
| WT without FUdR                                   | 20.2±0.5 | 23 |                   | 63/120 |                      | Fig. S2G |
| <i>pfd-6(gk493446)</i> without<br>FUdR            | 19.4±0.5 | 23 | -4%               | 74/120 | 0.1674               | Fig. S2G |

|                                                    |          |    |                              |        |                                 |          |
|----------------------------------------------------|----------|----|------------------------------|--------|---------------------------------|----------|
| <i>daf-2(e1370)</i> without FUdR                   | 50.5±1.3 | 58 | 150%                         | 63/120 | <0.0001                         | Fig. S2G |
| <i>pfid-6(gk493446); daf-2(e1370)</i> without FUdR | 37.4±1.1 | 45 | -26% <sup><i>daf-2</i></sup> | 83/120 | <0.0001 <sup><i>daf-2</i></sup> | Fig. S2G |
| WT without FUdR                                    | 16.5±0.5 | 19 |                              | 67/120 |                                 |          |
| <i>pfid-6(gk493446)</i> without FUdR               | 13.0±0.5 | 16 | -21%                         | 80/120 | 0.0001                          |          |
| <i>daf-2(e1370)</i> without FUdR                   | 41.9±1.4 | 54 | 154%                         | 83/120 | <0.0001                         |          |
| <i>pfid-6(gk493446); daf-2(e1370)</i> without FUdR | 32.3±1.3 | 41 | -23% <sup><i>daf-2</i></sup> | 69/120 | <0.0001 <sup><i>daf-2</i></sup> |          |
| WT/control RNAi                                    | 16.0±0.6 | 19 |                              | 69/72  |                                 | Fig. S2H |
| WT/ <i>pfid-6</i> RNAi                             | 17.1±0.5 | 19 | 7%                           | 65/68  | 0.4042                          | Fig. S2H |
| <i>hsb-1(cg116)</i> /control RNAi                  | 20.9±0.9 | 27 | 30%                          | 56/72  | <0.0001                         | Fig. S2H |
| <i>hsb-1(cg116)/pfid-6</i> RNAi                    | 22.0±0.8 | 25 | 5% <sup><i>hsb-1</i></sup>   | 57/69  | 0.5584 <sup><i>hsb-1</i></sup>  | Fig. S2H |
| WT/control RNAi                                    | 17.1±0.5 | 21 |                              | 71/72  |                                 |          |
| WT/ <i>pfid-6</i> RNAi                             | 18.3±0.6 | 21 | 7%                           | 71/72  | 0.1424                          |          |
| <i>hsb-1(cg116)</i> /control RNAi                  | 20.0±0.8 | 26 | 17%                          | 64/72  | 0.0011                          |          |
| <i>hsb-1(cg116)/pfid-6</i> RNAi                    | 21.4±0.7 | 26 | 7% <sup><i>hsb-1</i></sup>   | 71/72  | 0.4640 <sup><i>hsb-1</i></sup>  |          |

Lifespan data within solid lines are the same experimental sets.

\*: These lifespan assays were carried out at 22.5°C.

*p* values were calculated within the sets by using the log-rank (Mantel-Cox) method.

Percent (%) changes and *p* values were calculated with each control that is located in the first row within the solid line. The other comparisons used for calculating % changes and *p* values were indicated as superscripts.

Number of animals that died indicates the number of worms that counted as dead, and total indicates the number of worms that were initially used for our lifespan assays, including censored worms.

**Supplementary Table 4. Analysis of lifespan assay results related to Figure 3 and Figure S3.**

| Strain                                               | Mean lifespan $\pm$ s.e.m. (days) | 75th percentile | % change                        | Number of animals that died/total | <i>p</i> value vs. control         | Figure in text |
|------------------------------------------------------|-----------------------------------|-----------------|---------------------------------|-----------------------------------|------------------------------------|----------------|
| Intestine/control RNAi                               | 23.4 $\pm$ 0.6                    | 27              |                                 | 49/103                            |                                    | Fig. 3B        |
| Intestine/ <i>pf</i> d-6 RNAi                        | 23.6 $\pm$ 0.6                    | 27              | 1%                              | 70/120                            | 0.4104                             | Fig. 3B        |
| <i>daf-2(e1370)</i><br>Intestine/control RNAi        | 49.4 $\pm$ 0.8                    | 57              | 111%                            | 89/120                            | <0.0001                            | Fig. 3B        |
| <i>daf-2(e1370)</i><br>Intestine/ <i>pf</i> d-6 RNAi | 39.3 $\pm$ 0.5                    | 42              | -20% <sup><i>daf-2(-)</i></sup> | 76/120                            | <0.0001 <sup><i>daf-2(-)</i></sup> | Fig. 3B        |
| <i>daf-2(e1370)</i><br>Intestine/control RNAi        | 50.8 $\pm$ 0.9                    | 58              | 117%                            | 97/120                            | <0.0001                            |                |
| <i>daf-2(e1370)</i><br>Intestine/ <i>pf</i> d-6 RNAi | 39.3 $\pm$ 0.6                    | 43              | -23% <sup><i>daf-2(-)</i></sup> | 102/120                           | <0.0001 <sup><i>daf-2(-)</i></sup> |                |
| Intestine/control RNAi                               | 18.3 $\pm$ 0.5                    | 21              |                                 | 89/120                            |                                    |                |
| Intestine/ <i>pf</i> d-6 RNAi                        | 19.6 $\pm$ 0.6                    | 23              | 7%                              | 73/120                            | 0.0526                             |                |

|                                                      |          |    |                                 |         |                                    |         |
|------------------------------------------------------|----------|----|---------------------------------|---------|------------------------------------|---------|
| <i>daf-2(e1370)</i><br>Intestine/control RNAi        | 44.7±1.2 | 53 | 145%                            | 93/120  | <0.0001                            |         |
| <i>daf-2(e1370)</i><br>Intestine/ <i>pdf-6</i> RNAi  | 35.7±0.6 | 41 | -20% <sup><i>daf-2(-)</i></sup> | 113/122 | <0.0001 <sup><i>daf-2(-)</i></sup> |         |
| <i>daf-2(e1370)</i><br>Intestine/control RNAi        | 35.9±1.0 | 43 | 96%                             | 96/120  | <0.0001                            |         |
| <i>daf-2(e1370)</i><br>Intestine/ <i>pdf-6</i> RNAi  | 29.8±0.8 | 36 | -17% <sup><i>daf-2(-)</i></sup> | 98/120  | <0.0001 <sup><i>daf-2(-)</i></sup> |         |
| Hypodermis/control<br>RNAi                           | 18.9±0.5 | 21 |                                 | 53/90   |                                    | Fig. 3C |
| Hypodermis/ <i>pdf-6</i> RNAi                        | 19.4±0.5 | 23 | 3%                              | 81/120  | 0.1756                             | Fig. 3C |
| <i>daf-2(e1370)</i><br>Hypodermis/control<br>RNAi    | 46.5±0.7 | 53 | 147%                            | 95/120  | <0.0001                            | Fig. 3C |
| <i>daf-2(e1370)</i><br>Hypodermis/ <i>pdf-6</i> RNAi | 39.6±0.5 | 42 | -15% <sup><i>daf-2(-)</i></sup> | 90/120  | <0.0001 <sup><i>daf-2(-)</i></sup> | Fig. 3C |
| <i>daf-2(e1370)</i><br>Hypodermis/control<br>RNAi    | 49.6±1.5 | 61 | 163%                            | 73/90   | <0.0001                            |         |
| <i>daf-2(e1370)</i><br>Hypodermis/ <i>pdf-6</i> RNAi | 40.5±0.5 | 46 | -18% <sup><i>daf-2(-)</i></sup> | 93/120  | <0.0001 <sup><i>daf-2(-)</i></sup> |         |
| Hypodermis/control<br>RNAi                           | 21.4±0.6 | 26 |                                 | 81/121  |                                    |         |
| Hypodermis/ <i>pdf-6</i> RNAi                        | 18.2±0.8 | 23 | -15%                            | 69/90   | 0.0033                             |         |
| <i>daf-2(e1370)</i><br>Hypodermis/control<br>RNAi    | 39.6±1.4 | 49 | 85%                             | 82/120  | <0.0001                            |         |
| <i>daf-2(e1370)</i><br>Hypodermis/ <i>pdf-6</i> RNAi | 31.3±0.8 | 37 | -21% <sup><i>daf-2(-)</i></sup> | 104/120 | <0.0001 <sup><i>daf-2(-)</i></sup> |         |
| <i>daf-2(e1370)</i><br>Hypodermis/control<br>RNAi    | 39.2±0.8 | 46 | 83%                             | 96/120  | <0.0001                            |         |

|                                                       |          |    |                                 |         |                                    |          |
|-------------------------------------------------------|----------|----|---------------------------------|---------|------------------------------------|----------|
| <i>daf-2(e1370)</i><br>Hypodermis/ <i>pfid-6</i> RNAi | 32.0±0.8 | 39 | -18% <sup><i>daf-2(-)</i></sup> | 105/120 | <0.0001 <sup><i>daf-2(-)</i></sup> |          |
| Muscle/control RNAi                                   | 17.1±1.0 | 21 |                                 | 23/50   |                                    | Fig. 3D  |
| Muscle/ <i>pfid-6</i> RNAi                            | 18.1±0.7 | 21 | 6%                              | 36/50   | 0.5195                             | Fig. 3D  |
| <i>daf-2(e1370)</i><br>Muscle/control RNAi            | 49.0±1.2 | 61 | 187%                            | 99/119  | <0.0001                            | Fig. 3D  |
| <i>daf-2(e1370)</i> Muscle/ <i>pfid-6</i> RNAi        | 50.7±1.2 | 61 | 3% <sup><i>daf-2(-)</i></sup>   | 92/119  | 0.4865 <sup><i>daf-2(-)</i></sup>  | Fig. 3D  |
| Muscle/control RNAi                                   | 16.8±0.8 | 21 |                                 | 31/60   |                                    |          |
| Muscle/ <i>pfid-6</i> RNAi                            | 17.2±0.9 | 21 | 2%                              | 40/60   | 0.6825                             |          |
| <i>daf-2(e1370)</i><br>Muscle/control RNAi            | 45.4±1.7 | 58 | 170%                            | 101/120 | <0.0001                            |          |
| <i>daf-2(e1370)</i> Muscle/ <i>pfid-6</i> RNAi        | 48.8±1.5 | 62 | 8% <sup><i>daf-2(-)</i></sup>   | 106/124 | 0.5884 <sup><i>daf-2(-)</i></sup>  |          |
| Neuron/control RNAi                                   | 22.8±0.6 | 27 |                                 | 80/120  |                                    | Fig. 3E  |
| Neuron/ <i>pfid-6</i> RNAi                            | 23.5±0.5 | 27 | 3%                              | 80/120  | 0.6029                             | Fig. 3E  |
| <i>daf-2(e1370)</i><br>Neuron/control RNAi            | 44.5±1.2 | 50 | 95%                             | 76/120  | <0.0001                            | Fig. 3E  |
| <i>daf-2(e1370)</i> Neuron/ <i>pfid-6</i> RNAi        | 45.5±0.9 | 50 | 2% <sup><i>daf-2(-)</i></sup>   | 88/120  | 0.9774 <sup><i>daf-2(-)</i></sup>  | Fig. 3E  |
| Neuron/control RNAi                                   | 21.1±0.6 | 24 |                                 | 82/120  |                                    |          |
| Neuron/ <i>pfid-6</i> RNAi                            | 22.6±0.5 | 27 | 7%                              | 73/120  | 0.0788                             |          |
| <i>daf-2(e1370)</i><br>Neuron/control RNAi            | 41.4±1.2 | 49 | 96%                             | 86/120  | <0.0001                            |          |
| <i>daf-2(e1370)</i> Neuron/ <i>pfid-6</i> RNAi        | 39.2±1.1 | 46 | -5% <sup><i>daf-2(-)</i></sup>  | 88/120  | 0.0531 <sup><i>daf-2(-)</i></sup>  |          |
| <i>daf-2(e1370)</i>                                   | 38.6±1.5 | 49 |                                 | 71/120  |                                    | Fig. S3B |
| <i>pfid-6(gk493446); daf-2(e1370)</i>                 | 31.8±1.0 | 38 | -18%                            | 64/120  | 0.0001                             | Fig. S3B |



|                                                                   |          |    |                                                  |         |                                                           |          |
|-------------------------------------------------------------------|----------|----|--------------------------------------------------|---------|-----------------------------------------------------------|----------|
| <i>pdf-6(gk493446); daf-2(e1370); yhEX133[pfd-6p::pfd-6::gfp]</i> | 37.3±1.3 | 48 | -3% (17% <sup><i>pdf-6(-); daf-2(-)</i></sup> )  | 68/120  | 0.1520<br>(0.0014 <sup><i>pdf-6(-); daf-2(-)</i></sup> )  | Fig. S3B |
| <i>pdf-6(gk493446); daf-2(e1370); yhEX134[pfd-6p::pfd-6::gfp]</i> | 39.9±1.9 | 55 | 3% (25% <sup><i>pdf-6(-); daf-2(-)</i></sup> )   | 47/120  | 0.7275<br>(0.0005 <sup><i>pdf-6(-); daf-2(-)</i></sup> )  | Fig. S3B |
| <i>daf-2(e1370)</i>                                               | 37.1±1.4 | 48 |                                                  | 68/120  |                                                           |          |
| <i>pdf-6(gk493446); daf-2(e1370)</i>                              | 25.1±0.9 | 28 | -32%                                             | 75/120  | <0.0001                                                   |          |
| <i>pdf-6(gk493446); daf-2(e1370); yhEX133[pfd-6p::pfd-6::gfp]</i> | 32.3±1.1 | 42 | -13% (29% <sup><i>pdf-6(-); daf-2(-)</i></sup> ) | 102/120 | 0.0134<br>(<0.0001 <sup><i>pdf-6(-); daf-2(-)</i></sup> ) |          |
| <i>pdf-6(gk493446); daf-2(e1370); yhEX134[pfd-6p::pfd-6::gfp]</i> | 39.3±1.1 | 47 | 6% (57% <sup><i>pdf-6(-); daf-2(-)</i></sup> )   | 119/140 | 0.1621<br>(<0.0001 <sup><i>pdf-6(-); daf-2(-)</i></sup> ) |          |
| WT                                                                | 20.9±0.6 | 25 |                                                  | 97/150  |                                                           | Fig. S3C |
| <i>yhEX132[pfd-6p::pfd-6::gfp]</i>                                | 24.2±0.6 | 28 | 16%                                              | 77/120  | 0.0007                                                    | Fig. S3C |
| <i>yhEX133[pfd-6p::pfd-6::gfp]</i>                                | 22.9±0.7 | 28 | 10%                                              | 82/120  | 0.0250                                                    | Fig. S3C |
| <i>yhEX134[pfd-6p::pfd-6::gfp]</i>                                | 23.0±0.7 | 28 | 10%                                              | 78/135  | 0.0110                                                    | Fig. S3C |
| WT                                                                | 19.0±0.5 | 24 |                                                  | 103/120 |                                                           |          |
| <i>yhEX132[pfd-6p::pfd-6::gfp]</i>                                | 21.9±0.6 | 26 | 15%                                              | 102/120 | 0.0001                                                    |          |
| <i>yhEX133[pfd-6p::pfd-6::gfp]</i>                                | 20.6±0.6 | 26 | 8%                                               | 115/150 | 0.0133                                                    |          |
| <i>yhEX134[pfd-6p::pfd-6::gfp]</i>                                | 20.7±0.6 | 26 | 9%                                               | 110/150 | 0.0041                                                    |          |
| WT                                                                | 24.3±0.6 | 30 |                                                  | 104/121 |                                                           |          |
| <i>yhEX132[pfd-6p::pfd-6::gfp]</i>                                | 27.2±0.7 | 31 | 12%                                              | 86/121  | 0.0249                                                    |          |
| <i>yhEX133[pfd-6p::pfd-6::gfp]</i>                                | 21.3±0.7 | 29 | -12%                                             | 107/151 | 0.0050                                                    |          |

|                                                 |          |    |                                 |         |                                    |          |
|-------------------------------------------------|----------|----|---------------------------------|---------|------------------------------------|----------|
| <i>yhEX134[pfd-6p::pfd-6::gfp]</i>              | 22.2±0.8 | 27 | 9%                              | 108/135 | 0.3257                             |          |
| <i>rde-1(ne219)/control RNAi</i>                | 18.0±0.3 | 21 |                                 | 103/120 |                                    | Fig. S3D |
| <i>rde-1(ne219)/pfd-6 RNAi</i>                  | 18.1±0.3 | 21 | 1%                              | 89/120  | 0.6756                             | Fig. S3D |
| <i>daf-2(e1370); rde-1(ne219)/control RNAi</i>  | 43.5±1.1 | 53 | 142%                            | 85/120  | <0.0001                            | Fig. S3D |
| <i>daf-2(e1370); rde-1(ne219)/pfd-6 RNAi</i>    | 41.8±0.8 | 49 | -4% <sup><i>daf-2(-)</i></sup>  | 86/120  | 0.0073 <sup><i>daf-2(-)</i></sup>  | Fig. S3D |
| <i>daf-2(e1370); rde-1(ne219)/control RNAi</i>  | 39.9±0.7 | 46 | 122%                            | 87/120  | <0.0001                            |          |
| <i>daf-2(e1370); rde-1(ne219)/pfd-6 RNAi</i>    | 36.3±0.6 | 40 | -9% <sup><i>daf-2(-)</i></sup>  | 81/120  | <0.0001 <sup><i>daf-2(-)</i></sup> |          |
| <i>rde-1(ne219)/control RNAi</i>                | 17.2±0.4 | 21 |                                 | 106/120 |                                    |          |
| <i>rde-1(ne219)/pfd-6 RNAi</i>                  | 16.9±0.5 | 21 | -2%                             | 110/121 | 0.8954                             |          |
| <i>daf-2(e1370); rde-1(ne219)/control RNAi</i>  | 36.8±1.0 | 44 | 114%                            | 71/120  | <0.0001                            |          |
| <i>daf-2(e1370); rde-1(ne219)/pfd-6 RNAi</i>    | 32.8±0.9 | 37 | -11% <sup><i>daf-2(-)</i></sup> | 100/120 | 0.0010 <sup><i>daf-2(-)</i></sup>  |          |
| <i>daf-2(e1370); rde-1(ne219)/control RNAi</i>  | 31.6±1.2 | 39 | 84%                             | 70/120  | <0.0001                            |          |
| <i>daf-2(e1370); rde-1(ne219)/pfd-6 RNAi</i>    | 24.9±1.0 | 32 | -21% <sup><i>daf-2(-)</i></sup> | 60/120  | <0.0001 <sup><i>daf-2(-)</i></sup> |          |
| <i>sid-1(pk3321)/control RNAi</i>               | 19.6±0.5 | 22 |                                 | 64/120  |                                    | Fig. S3E |
| <i>sid-1(pk3321)/pfd-6 RNAi</i>                 | 20.5±0.6 | 25 | 5%                              | 64/120  | 0.1618                             | Fig. S3E |
| <i>daf-2(e1370); sid-1(pk3321)/control RNAi</i> | 41.1±1.0 | 50 | 110%                            | 72/100  | <0.0001                            | Fig. S3E |
| <i>daf-2(e1370); sid-1(pk3321)/pfd-6 RNAi</i>   | 44.1±1.0 | 50 | 7% <sup><i>daf-2(-)</i></sup>   | 67/90   | 0.0353 <sup><i>daf-2(-)</i></sup>  | Fig. S3E |
| <i>sid-1(pk3321)/control RNAi</i>               | 19.5±0.8 | 24 |                                 | 39/90   |                                    |          |

|                                                 |          |    |                               |        |                                   |  |
|-------------------------------------------------|----------|----|-------------------------------|--------|-----------------------------------|--|
| <i>sid-1(pk3321)/pfd-6</i> RNAi                 | 19.9±0.6 | 24 | 2%                            | 50/120 | 0.7150                            |  |
| <i>daf-2(e1370); sid-1(pk3321)/control</i> RNAi | 41.9±1.3 | 52 | 115%                          | 63/85  | <0.0001                           |  |
| <i>daf-2(e1370); sid-1(pk3321)/pfd-6</i> RNAi   | 42.4±1.3 | 49 | 1% <sup><i>daf-2(-)</i></sup> | 78/90  | 0.8462 <sup><i>daf-2(-)</i></sup> |  |

Lifespan data within solid lines are the same experimental sets.

*p* values were calculated within the sets by using the log-rank (Mantel-Cox) method.

Percent (%) changes and *p* values were calculated with each control that is located in the first row within the solid line. The other comparisons used for calculating % changes and *p* values were indicated as superscripts.

Number of animals that died indicates the number of worms that counted as dead, and total indicates the number of worms that were initially used for our lifespan assays, including censored worms.

**Supplementary Table 5. Analysis of lifespan assay results related to Figure 4 and Figure S4.**

| Strain                 | Mean lifespan ±s.e.m. (days) | 75th percentile | % change | Number of animals that died/total | <i>p</i> value vs. control | Figure in text  |
|------------------------|------------------------------|-----------------|----------|-----------------------------------|----------------------------|-----------------|
| WT/control RNAi        | 22.7±0.4                     | 27              |          | 119/140                           |                            | Fig. 4C-4E, S4C |
| WT/ <i>ruvb-1</i> RNAi | 21.6±0.2                     | 24              | -5%      | 125/140                           | 0.0012                     | Fig. 4C         |

|                                          |          |    |                                 |         |                                    |                    |
|------------------------------------------|----------|----|---------------------------------|---------|------------------------------------|--------------------|
| WT/ <i>ruvb-2</i> RNAi                   | 21.5±0.3 | 24 | -5                              | 119/140 | 0.0066                             | Fig. 4D            |
| WT/ <i>uri-1</i> RNAi                    | 25.8±0.5 | 31 | 14                              | 106/120 | <0.0001                            | Fig. 4E            |
| WT/F35H10.6 ( <i>UXT</i> ) RNAi          | 23.7±0.4 | 27 | 5%                              | 113/140 | 0.0266                             | Fig. S4C           |
| <i>daf-2(e1370)</i> /control RNAi        | 53.7±1.9 | 59 | 137%                            | 15/30   | <0.0001                            | Fig. 4C-4E, S4C    |
| <i>daf-2(e1370)/ruvb-1</i> RNAi          | 41.2±0.8 | 48 | -23% <sup><i>daf-2(-)</i></sup> | 104/120 | <0.0001 <sup><i>daf-2(-)</i></sup> | Fig. 4C            |
| <i>daf-2(e1370)/ruvb-2</i> RNAi          | 39.0±0.5 | 42 | -27% <sup><i>daf-2(-)</i></sup> | 76/120  | <0.0001 <sup><i>daf-2(-)</i></sup> | Fig. 4D            |
| <i>daf-2(e1370)/uri-1</i> RNAi           | 42.3±1.1 | 49 | -21% <sup><i>daf-2(-)</i></sup> | 22/90   | 0.0001 <sup><i>daf-2(-)</i></sup>  | Fig. 4E            |
| <i>daf-2(e1370)/ F35H10.6 (UXT)</i> RNAi | 51.3±1.8 | 59 | -5% <sup><i>daf-2(-)</i></sup>  | 50/90   | 0.7559 <sup><i>daf-2(-)</i></sup>  | Fig. S4C           |
| WT/control RNAi                          | 20.9±0.4 | 24 |                                 | 119/140 |                                    |                    |
| WT/ <i>ruvb-1</i> RNAi                   | 20.1±0.4 | 24 | -4%                             | 127/140 | 0.0914                             |                    |
| WT/ <i>ruvb-2</i> RNAi                   | 20.9±0.4 | 24 | 0%                              | 121/140 | 0.7597                             |                    |
| WT/ <i>uri-1</i> RNAi                    | 27.3±0.5 | 33 | 30%                             | 107/120 | <0.0001                            |                    |
| WT/F35H10.6 ( <i>UXT</i> ) RNAi          | 21.7±0.4 | 24 | 4%                              | 127/140 | 0.3375                             |                    |
| <i>daf-2(e1370)</i> /control RNAi        | 49.2±1.4 | 56 | 135%                            | 58/100  | <0.0001                            |                    |
| <i>daf-2(e1370)/ruvb-1</i> RNAi          | 41.9±1.0 | 49 | -15% <sup><i>daf-2(-)</i></sup> | 90/120  | <0.0001 <sup><i>daf-2(-)</i></sup> |                    |
| <i>daf-2(e1370)/ruvb-2</i> RNAi          | 43.1±0.9 | 51 | -12% <sup><i>daf-2(-)</i></sup> | 100/120 | <0.0001 <sup><i>daf-2(-)</i></sup> |                    |
| <i>daf-2(e1370)/uri-1</i> RNAi           | 40.9±0.6 | 45 | -17% <sup><i>daf-2(-)</i></sup> | 100/120 | <0.0001 <sup><i>daf-2(-)</i></sup> |                    |
| <i>daf-2(e1370)/ F35H10.6 (UXT)</i> RNAi | 49.8±1.4 | 59 | 1% <sup><i>daf-2(-)</i></sup>   | 82/100  | 0.1634 <sup><i>daf-2(-)</i></sup>  |                    |
| <i>pfid-6(gk493446)</i> /control RNAi    | 20.4±0.4 | 22 |                                 | 103/120 |                                    | Fig. S4D, S4E, S4G |

|                                                           |          |    |                                           |         |                                               |                    |
|-----------------------------------------------------------|----------|----|-------------------------------------------|---------|-----------------------------------------------|--------------------|
| <i>pfid-6(gk493446)/ruvb-1</i> RNAi                       | 19.6±0.2 | 22 | -4%                                       | 121/140 | 0.0109                                        | Fig. S4D           |
| <i>pfid-6(gk493446)/ruvb-2</i> RNAi                       | 20.2±0.3 | 22 | -1%                                       | 116/140 | 0.4116                                        | Fig. S4E           |
| <i>pfid-6(gk493446)/uri-1</i> RNAi                        | 20.2±0.4 | 25 | -1%                                       | 99/120  | 0.8768                                        |                    |
| <i>pfid-6(gk493446)/F35H10.6 (UXT)</i> RNAi               | 20.7±0.3 | 22 | 1%                                        | 117/136 | 0.7488                                        | Fig. S4G           |
| <i>pfid-6(gk493446); daf-2(e1370)/control</i> RNAi        | 33.9±1.1 | 44 | 66%                                       | 108/120 | <0.0001                                       | Fig. S4D, S4E, S4G |
| <i>pfid-6(gk493446); daf-2(e1370)/ruvb-1</i> RNAi         | 32.6±1.1 | 38 | -4% <sup><i>pfid-6(-); daf-2(-)</i></sup> | 45/90   | 0.1055 <sup><i>pfid-6(-); daf-2(-)</i></sup>  | Fig. S4D           |
| <i>pfid-6(gk493446); daf-2(e1370)/ruvb-2</i> RNAi         | 34.1±1.0 | 40 | 1% <sup><i>pfid-6(-); daf-2(-)</i></sup>  | 89/120  | 0.6539 <sup><i>pfid-6(-); daf-2(-)</i></sup>  | Fig. S4E           |
| <i>pfid-6(gk493446); daf-2(e1370)/uri-1</i> RNAi          | 31.7±0.5 | 35 | -6% <sup><i>pfid-6(-); daf-2(-)</i></sup> | 104/120 | <0.0001 <sup><i>pfid-6(-); daf-2(-)</i></sup> |                    |
| <i>pfid-6(gk493446); daf-2(e1370)/F35H10.6 (UXT)</i> RNAi | 36.2±1.0 | 44 | 7% <sup><i>pfid-6(-); daf-2(-)</i></sup>  | 109/120 | 0.2116 <sup><i>pfid-6(-); daf-2(-)</i></sup>  | Fig. S4G           |
| <i>pfid-6(gk493446)/control</i> RNAi                      | 16.4±0.3 | 27 |                                           | 102/140 |                                               | Fig. S4F           |
| <i>pfid-6(gk493446)/ruvb-1</i> RNAi                       | 17.5±0.4 | 22 | 7%                                        | 120/140 | 0.0116                                        |                    |
| <i>pfid-6(gk493446)/ruvb-2</i> RNAi                       | 18.5±0.3 | 21 | 13%                                       | 135/140 | <0.0001                                       |                    |
| <i>pfid-6(gk493446)/uri-1</i> RNAi                        | 19.2±0.3 | 22 | 17%                                       | 74/90   | <0.0001                                       | Fig. S4F           |
| <i>pfid-6(gk493446)/F35H10.6 (utx-1)</i> RNAi             | 17.3±0.2 | 19 | 5%                                        | 108/140 | 0.0740                                        |                    |
| <i>pfid-6(gk493446); daf-2(e1370)/control</i> RNAi        | 28.6±1.0 | 38 | 74%                                       | 109/120 | <0.0001                                       | Fig. S4F           |
| <i>pfid-6(gk493446); daf-2(e1370)/ruvb-1</i> RNAi         | 29.4±0.9 | 35 | 3% <sup><i>pfid-6(-); daf-2(-)</i></sup>  | 79/90   | 0.6712 <sup><i>pfid-6(-); daf-2(-)</i></sup>  |                    |

|                                                             |          |    |                                           |         |                                              |                  |
|-------------------------------------------------------------|----------|----|-------------------------------------------|---------|----------------------------------------------|------------------|
| <i>pfid-6(gk493446); daf-2(e1370)/ruvb-2</i> RNAi           | 29.3±1.0 | 35 | 2% <sup><i>pfid-6(-); daf-2(-)</i></sup>  | 80/90   | 0.8391 <sup><i>pfid-6(-); daf-2(-)</i></sup> |                  |
| <i>pfid-6(gk493446); daf-2(e1370)/uri-1</i> RNAi            | 31.5±0.6 | 35 | 10% <sup><i>pfid-6(-); daf-2(-)</i></sup> | 82/90   | 0.9375 <sup><i>pfid-6(-); daf-2(-)</i></sup> | Fig. S4F         |
| <i>pfid-6(gk493446); daf-2(e1370)/F35H10.6 (utx-1)</i> RNAi | 28.8±1.0 | 38 | 1% <sup><i>pfid-6(-); daf-2(-)</i></sup>  | 101/118 | 0.6003 <sup><i>pfid-6(-); daf-2(-)</i></sup> |                  |
| WT/control RNAi                                             | 21.9±0.4 | 25 |                                           | 120/150 |                                              | Fig. S4H,S4I,S4K |
| WT/ <i>pfid-1</i> RNAi                                      | 21.6±0.4 | 25 | -1%                                       | 123/150 | 0.4568                                       | Fig. S4H         |
| WT/ <i>pfid-2</i> RNAi                                      | 21.0±0.4 | 23 | -4%                                       | 119/150 | 0.0526                                       |                  |
| WT/ <i>pfid-3</i> RNAi                                      | 20.0±0.4 | 23 | -8%                                       | 110/151 | 0.0061                                       | Fig. S4I         |
| WT/ <i>pfid-5</i> RNAi                                      | 20.7±0.4 | 23 | -5%                                       | 115/150 | 0.0156                                       | Fig. S4K         |
| <i>daf-2(e1370)/control</i> RNAi                            | 42.9±1.0 | 50 | 96%                                       | 124/152 | <0.0001                                      | Fig. S4H,S4I,S4K |
| <i>daf-2(e1370)/pfid-1</i> RNAi                             | 42.3±0.9 | 50 | -2% <sup><i>daf-2(-)</i></sup>            | 127/150 | 0.1526 <sup><i>daf-2(-)</i></sup>            | Fig. S4H         |
| <i>daf-2(e1370)/pfid-2</i> RNAi                             | 41.0±1.0 | 50 | -5% <sup><i>daf-2(-)</i></sup>            | 114/150 | 0.2088 <sup><i>daf-2(-)</i></sup>            |                  |
| <i>daf-2(e1370)/pfid-3</i> RNAi                             | 42.4±0.9 | 47 | -1% <sup><i>daf-2(-)</i></sup>            | 119/146 | 0.4578 <sup><i>daf-2(-)</i></sup>            | Fig. S4I         |
| <i>daf-2(e1370)/pfid-5</i> RNAi                             | 43.2±0.9 | 50 | 1% <sup><i>daf-2(-)</i></sup>             | 140/149 | 0.8799 <sup><i>daf-2(-)</i></sup>            | Fig. S4K         |
| WT/control RNAi                                             | 23.8±0.6 | 29 |                                           | 113/150 |                                              |                  |
| WT/ <i>pfid-1</i> RNAi                                      | 24.9±0.6 | 31 | 5%                                        | 107/150 | 0.1637                                       |                  |
| WT/ <i>pfid-2</i> RNAi                                      | 24.4±0.6 | 29 | 2%                                        | 108/151 | 0.6647                                       |                  |
| WT/ <i>pfid-3</i> RNAi                                      | 24.1±0.6 | 31 | 1%                                        | 105/150 | 0.4517                                       |                  |
| WT/ <i>pfid-5</i> RNAi                                      | 26.4±0.6 | 31 | 11%                                       | 105/150 | 0.0003                                       |                  |
| <i>daf-2(e1370)/control</i> RNAi                            | 44.4±0.8 | 51 | 87%                                       | 136/150 | <0.0001                                      |                  |
| <i>daf-2(e1370)/pfid-1</i> RNAi                             | 42.9±0.8 | 51 | -3% <sup><i>daf-2(-)</i></sup>            | 132/150 | 0.0336 <sup><i>daf-2(-)</i></sup>            |                  |
| <i>daf-2(e1370)/pfid-2</i> RNAi                             | 40.0±0.8 | 46 | -10% <sup><i>daf-2(-)</i></sup>           | 125/149 | <0.0001 <sup><i>daf-2(-)</i></sup>           |                  |

|                                  |          |    |                                 |         |                                    |         |
|----------------------------------|----------|----|---------------------------------|---------|------------------------------------|---------|
| <i>daf-2(e1370)/pfd-3</i> RNAi   | 45.4±0.8 | 51 | 2% <sup><i>daf-2(-)</i></sup>   | 132/150 | 0.4791 <sup><i>daf-2(-)</i></sup>  |         |
| <i>daf-2(e1370)/pfd-5</i> RNAi   | 45.4±0.8 | 51 | 2% <sup><i>daf-2(-)</i></sup>   | 128/149 | 0.4145 <sup><i>daf-2(-)</i></sup>  |         |
| WT/control RNAi                  | 23.0±0.6 | 27 |                                 | 97/112  |                                    |         |
| WT/ <i>pfd-1</i> RNAi            | 24.3±0.6 | 29 | 6%                              | 68/90   | 0.3045                             |         |
| WT/ <i>pfd-2</i> RNAi            | 22.8±0.6 | 27 | -1%                             | 87/120  | 0.8569                             |         |
| WT/ <i>pfd-6</i> RNAi            | 23.6±0.7 | 29 | 3%                              | 82/120  | 0.2716                             |         |
| <i>daf-2(e1370)/control</i> RNAi | 49.4±1.1 | 57 | 115%                            | 75/96   | <0.0001                            |         |
| <i>daf-2(e1370)/pfd-1</i> RNAi   | 49.0±1.0 | 57 | -1% <sup><i>daf-2(-)</i></sup>  | 107/120 | 0.7571 <sup><i>daf-2(-)</i></sup>  |         |
| <i>daf-2(e1370)/pfd-2</i> RNAi   | 46.9±1.1 | 54 | -5% <sup><i>daf-2(-)</i></sup>  | 105/122 | 0.2922 <sup><i>daf-2(-)</i></sup>  |         |
| <i>daf-2(e1370)/pfd-6</i> RNAi   | 42.3±0.8 | 48 | -14% <sup><i>daf-2(-)</i></sup> | 104/120 | <0.0001 <sup><i>daf-2(-)</i></sup> |         |
| WT/control RNAi                  | 23.6±0.6 | 29 |                                 | 71/125  |                                    | Fig. 4F |
| WT/ <i>pfd-1</i> RNAi            | 22.3±0.6 | 25 | -5%                             | 57/124  | 0.1238                             |         |
| WT/ <i>pfd-2</i> RNAi            | 23.6±0.7 | 27 | 0%                              | 44/93   | 0.6723                             | Fig. 4F |
| WT/ <i>pfd-6</i> RNAi            | 23.5±0.7 | 27 | 0%                              | 64/124  | 0.9507                             |         |
| <i>daf-2(e1370)/control</i> RNAi | 47.4±0.9 | 52 | 100%                            | 86/118  | <0.0001                            | Fig. 4F |
| <i>daf-2(e1370)/pfd-1</i> RNAi   | 45.1±0.9 | 52 | -5% <sup><i>daf-2(-)</i></sup>  | 96/122  | 0.0120 <sup><i>daf-2(-)</i></sup>  |         |
| <i>daf-2(e1370)/pfd-2</i> RNAi   | 43.0±1.0 | 52 | -9% <sup><i>daf-2(-)</i></sup>  | 100/120 | 0.0005 <sup><i>daf-2(-)</i></sup>  | Fig. 4F |
| <i>daf-2(e1370)/pfd-6</i> RNAi   | 40.4±0.7 | 46 | -15% <sup><i>daf-2(-)</i></sup> | 85/120  | <0.0001 <sup><i>daf-2(-)</i></sup> |         |
| WT/control RNAi                  | 22.1±0.5 | 26 |                                 | 59/120  |                                    |         |
| WT/ <i>pfd-1</i> RNAi            | 21.3±0.4 | 23 | -4%                             | 53/120  | 0.1665                             |         |
| WT/ <i>pfd-2</i> RNAi            | 22.3±0.5 | 26 | 1%                              | 53/120  | 0.7472                             |         |
| WT/ <i>pfd-6</i> RNAi            | 22.8±0.6 | 26 | 3%                              | 34/120  | 0.4693                             |         |
| <i>daf-2(e1370)/control</i> RNAi | 47.6±1.3 | 55 | 116%                            | 85/121  | <0.0001                            |         |
| <i>daf-2(e1370)/pfd-1</i> RNAi   | 47.0±1.3 | 59 | -1% <sup><i>daf-2(-)</i></sup>  | 92/120  | 0.7017 <sup><i>daf-2(-)</i></sup>  |         |

|                                  |          |    |                                 |         |                                    |          |
|----------------------------------|----------|----|---------------------------------|---------|------------------------------------|----------|
| <i>daf-2(e1370)/pfd-2</i> RNAi   | 42.7±1.6 | 53 | -10% <sup><i>daf-2(-)</i></sup> | 64/120  | 0.0181 <sup><i>daf-2(-)</i></sup>  |          |
| <i>daf-2(e1370)/pfd-6</i> RNAi   | 32.7±0.8 | 38 | -31% <sup><i>daf-2(-)</i></sup> | 71/120  | <0.0001 <sup><i>daf-2(-)</i></sup> |          |
| WT/control RNAi                  | 21.5±0.5 | 25 |                                 | 104/120 |                                    | Fig. S4J |
| WT/ <i>pfd-4</i> RNAi            | 22.1±0.5 | 25 | 3%                              | 70/90   | 0.7361                             | Fig. S4J |
| WT/ <i>pfd-6</i> RNAi            | 20.2±0.4 | 25 | -6%                             | 104/120 | 0.0070                             |          |
| <i>daf-2(e1370)/control</i> RNAi | 45.7±0.7 | 53 | 114%                            | 119/121 | <0.0001                            | Fig. S4J |
| <i>daf-2(e1370)/pfd-4</i> RNAi   | 43.9±0.7 | 49 | -4% <sup><i>daf-2(-)</i></sup>  | 116/120 | 0.0944 <sup><i>daf-2(-)</i></sup>  | Fig. S4J |
| <i>daf-2(e1370)/pfd-6</i> RNAi   | 39.4±0.6 | 52 | -14% <sup><i>daf-2(-)</i></sup> | 112/121 | <0.0001 <sup><i>daf-2(-)</i></sup> |          |
| WT/control RNAi                  | 22.6±0.5 | 27 |                                 | 97/120  |                                    |          |
| WT/ <i>pfd-4</i> RNAi            | 23.7±0.5 | 27 | 5%                              | 84/120  | 0.1233                             |          |
| WT/ <i>pfd-6</i> RNAi            | 23.5±0.7 | 29 | 4%                              | 87/120  | 0.0156                             |          |
| <i>daf-2(e1370)/control</i> RNAi | 53.0±0.9 | 56 | 135%                            | 102/120 | <0.0001                            |          |
| <i>daf-2(e1370)/pfd-4</i> RNAi   | 48.8±1.0 | 56 | -8% <sup><i>daf-2(-)</i></sup>  | 104/120 | 0.0006 <sup><i>daf-2(-)</i></sup>  |          |
| <i>daf-2(e1370)/pfd-6</i> RNAi   | 42.5±0.5 | 48 | -22% <sup><i>daf-2(-)</i></sup> | 107/121 | <0.0001 <sup><i>daf-2(-)</i></sup> |          |
| WT/control RNAi                  | 25.2±0.7 | 30 |                                 | 60/120  |                                    |          |
| WT/ <i>pfd-4</i> RNAi            | 25.1±0.7 | 30 | 0%                              | 65/120  | 0.9941                             |          |
| WT/ <i>pfd-6</i> RNAi            | 23.2±0.6 | 27 | -8%                             | 75/120  | 0.0266                             |          |
| <i>daf-2(e1370)/control</i> RNAi | 46.2±0.9 | 52 | 83%                             | 64/120  | <0.0001                            |          |
| <i>daf-2(e1370)/pfd-4</i> RNAi   | 46.2±0.8 | 55 | 0% <sup><i>daf-2(-)</i></sup>   | 92/120  | 0.7002 <sup><i>daf-2(-)</i></sup>  |          |
| <i>daf-2(e1370)/pfd-6</i> RNAi   | 37.0±0.5 | 42 | -20% <sup><i>daf-2(-)</i></sup> | 76/120  | <0.0001 <sup><i>daf-2(-)</i></sup> |          |

Lifespan data within solid lines are the same experimental sets.

*p* values were calculated within the sets by using the log-rank (Mantel-Cox) method.



Percent (%) changes and *p* values were calculated with each control that is located in the first row within the solid line. The other comparisons used for calculating % changes and *p* values were indicated as superscripts.

Number of animals that died indicates the number of worms that counted as dead, and total indicates the number of worms that were initially used for our lifespan assays, including censored worms.

**Supplementary Table 6. Analysis of lifespan assay results related to Figure 7 and Figure S7.**

| Strain                                               | Mean lifespan<br>±s.e.m.<br>(days) | 75th<br>percentile | % change                        | Number<br>of<br>animals<br>that<br>died/total | <i>p</i> value vs.<br>control      | Figure<br>in text |
|------------------------------------------------------|------------------------------------|--------------------|---------------------------------|-----------------------------------------------|------------------------------------|-------------------|
| Intestine/control RNAi                               | 18.4±0.3                           | 22                 | 0%                              | 96/120                                        |                                    | Fig. 7A,<br>7B    |
| Intestine/ <i>hsf-1</i> RNAi                         | 11.3±0.2                           | 16                 | -38%                            | 98/120                                        | <0.0001                            | Fig. 7A           |
| Intestine/ <i>daf-16</i> RNAi                        | 17.3±0.4                           | 22                 | -6%                             | 81/120                                        | 0.0667                             | Fig. 7B           |
| <i>daf-2(e1370)</i><br>Intestine/control RNAi        | 36.3±1.0                           | 43                 | 98%                             | 87/120                                        | <0.0001                            | Fig. 7A,<br>7B    |
| <i>daf-2(e1370)</i><br>Intestine/ <i>hsf-1</i> RNAi  | 11.4±0.2                           | 16                 | -69% <sup><i>daf-2(-)</i></sup> | 115/120                                       | <0.0001 <sup><i>daf-2(-)</i></sup> | Fig. 7A           |
| <i>daf-2(e1370)</i><br>Intestine/ <i>daf-16</i> RNAi | 18.6±0.7                           | 22                 | -49% <sup><i>daf-2(-)</i></sup> | 91/120                                        | <0.0001 <sup><i>daf-2(-)</i></sup> | Fig. 7B           |
| Intestine/control RNAi                               | 17.1±0.3                           | 20                 |                                 | 102/120                                       |                                    |                   |

|                                                       |          |    |                                 |         |                                    |                |
|-------------------------------------------------------|----------|----|---------------------------------|---------|------------------------------------|----------------|
| Intestine/ <i>hsf-1</i> RNAi                          | 11.5±0.2 | -  | -33%                            | 103/120 | <0.0001                            |                |
| Intestine/ <i>daf-16</i> RNAi                         | 16.3±0.3 | 18 | -5%                             | 88/120  | 0.3599                             |                |
| <i>daf-2(e1370)</i><br>Intestine/control RNAi         | 38.0±0.8 | 45 | 122%                            | 97/120  | <0.0001                            |                |
| <i>daf-2(e1370)</i><br>Intestine/ <i>hsf-1</i> RNAi   | 11.4±0.2 | 17 | -70% <sup><i>daf-2(-)</i></sup> | 100/120 | <0.0001 <sup><i>daf-2(-)</i></sup> |                |
| <i>daf-2(e1370)</i><br>Intestine/ <i>daf-16</i> RNAi  | 18.8±0.7 | 23 | -51% <sup><i>daf-2(-)</i></sup> | 102/120 | <0.0001 <sup><i>daf-2(-)</i></sup> |                |
| Hypodermis/control<br>RNAi                            | 18.9±0.4 | 22 |                                 | 81/120  |                                    | Fig. 7C,<br>7D |
| Hypodermis/ <i>hsf-1</i> RNAi                         | 12.0±0.2 | 16 | -8%                             | 110/120 | 0.0002                             | Fig. 7C        |
| Hypodermis/ <i>daf-16</i> RNAi                        | 15.8±0.4 | 19 | -9%                             | 89/120  | 0.0113                             | Fig. 7D        |
| <i>daf-2(e1370)</i><br>Hypodermis/control<br>RNAi     | 41.5±0.8 | 49 | 107%                            | 90/120  | <0.0001                            | Fig. 7C,<br>7D |
| <i>daf-2(e1370)</i><br>Hypodermis/ <i>hsf-1</i> RNAi  | 34.2±0.8 | 40 | -17% <sup><i>daf-2(-)</i></sup> | 88/120  | <0.0001 <sup><i>daf-2(-)</i></sup> | Fig. 7C        |
| <i>daf-2(e1370)</i><br>Hypodermis/ <i>daf-16</i> RNAi | 29.5±0.6 | 34 | -29% <sup><i>daf-2(-)</i></sup> | 86/120  | <0.0001 <sup><i>daf-2(-)</i></sup> | Fig. 7D        |
| Hypodermis/control<br>RNAi                            | 18.6±0.3 | 22 |                                 | 114/120 |                                    |                |
| Hypodermis/ <i>hsf-1</i> RNAi                         | 16.3±0.2 | 18 | -13%                            | 98/120  | <0.0001                            |                |
| Hypodermis/ <i>daf-16</i> RNAi                        | 14.9±0.3 | 18 | -20%                            | 79/120  | <0.0001                            |                |
| <i>daf-2(e1370)</i><br>Hypodermis/control<br>RNAi     | 42.2±1.1 | 51 | 127%                            | 98/120  | <0.0001                            |                |
| <i>daf-2(e1370)</i><br>Hypodermis/ <i>hsf-1</i> RNAi  | 31.2±0.5 | 34 | -26% <sup><i>daf-2(-)</i></sup> | 97/120  | <0.0001 <sup><i>daf-2(-)</i></sup> |                |
| <i>daf-2(e1370)</i><br>Hypodermis/ <i>daf-16</i> RNAi | 30.9±0.7 | 34 | -27% <sup><i>daf-2(-)</i></sup> | 83/120  | <0.0001 <sup><i>daf-2(-)</i></sup> |                |

|                                                      |            |    |                                |         |                                   |                  |
|------------------------------------------------------|------------|----|--------------------------------|---------|-----------------------------------|------------------|
| <i>rde-1(ne219)/control</i><br>RNAi                  | 18.4±0.3   | 22 |                                | 90/120  |                                   | Fig. S7A,<br>S7B |
| <i>rde-1(ne219)/hsf-1</i> RNAi                       | 18.5±0.4   | 22 | 1%                             | 95/120  | 0.6095                            | Fig. S7A         |
| <i>rde-1(ne219)/daf-16</i><br>RNAi                   | 18.1±0.3   | 22 | -1%                            | 99/120  | 0.6389                            | Fig. S7B         |
| <i>daf-2(e1370); rde-1(ne219)/control</i> RNAi       | 35.4±1.1   | 43 | 93%                            | 59/120  | <0.0001                           | Fig. S7A,<br>S7B |
| <i>daf-2(e1370); rde-1(ne219)/hsf-1</i> RNAi         | 34.2±1.0   | 40 | -3% <sup><i>daf-2(-)</i></sup> | 62/120  | 0.2345 <sup><i>daf-2(-)</i></sup> | Fig. S7A         |
| <i>daf-2(e1370); rde-1(ne219)/daf-16</i> RNAi        | 33.4±1.2   | 40 | -6% <sup><i>daf-2(-)</i></sup> | 55/120  | 0.2446 <sup><i>daf-2(-)</i></sup> | Fig. S7B         |
| <i>rde-1(ne219)/control</i><br>RNAi                  | 17.9±0.3   | 20 |                                | 105/120 |                                   |                  |
| <i>rde-1(ne219)/hsf-1</i> RNAi                       | 17.5±0.4   | 20 | -2%                            | 68/120  | 0.6517                            |                  |
| <i>rde-1(ne219)/daf-16</i><br>RNAi                   | 17.3±0.3   | 20 | -3%                            | 93/120  | 0.1287                            |                  |
| <i>daf-2(e1370); rde-1(ne219)/control</i> RNAi       | 32.8±0.8   | 40 | 83%                            | 92/120  | <0.0001                           |                  |
| <i>daf-2(e1370); rde-1(ne219)/hsf-1</i> RNAi         | 31.1±0.7   | 37 | -5% <sup><i>daf-2(-)</i></sup> | 89/120  | 0.0101 <sup><i>daf-2(-)</i></sup> |                  |
| <i>daf-2(e1370); rde-1(ne219)/daf-16</i> RNAi        | 32.6±1.0   | 37 | -1% <sup><i>daf-2(-)</i></sup> | 63/120  | 0.7565 <sup><i>daf-2(-)</i></sup> |                  |
| <i>daf-2(e1370);</i><br>Intestine/control RNAi       | 35.8±1.4   | 47 |                                | 79/120  |                                   |                  |
| <i>daf-2(e1370)</i><br>Intestine/ <i>hsf-1</i> RNAi  | 14.0±0.4   | 19 | -61%                           | 114/120 | <0.0001                           |                  |
| <i>daf-2(e1370)</i><br>Intestine/ <i>daf-16</i> RNAi | 22.4±1.0   | 30 | -37%                           | 111/120 | <0.0001                           |                  |
| <i>daf-2(e1370)</i><br>Intestine/control RNAi        | 34.1±1.1   | 41 |                                | 60/120  |                                   |                  |
| <i>daf-2(e1370)</i><br>Intestine/ <i>hsf-1</i> RNAi  | 11.86±0.39 | 17 | -65%                           | 54/120  | <0.0001                           |                  |
| <i>daf-2(e1370)</i><br>Intestine/ <i>daf-16</i> RNAi | 22.5±0.7   | 28 | -34%                           | 78/120  | <0.0001                           |                  |

|                                                       |          |    |                                 |        |                                    |                  |
|-------------------------------------------------------|----------|----|---------------------------------|--------|------------------------------------|------------------|
| <i>daf-2(e1370)</i><br>Hypodermis/control<br>RNAi     | 36.4±1.3 | 47 |                                 | 89/102 |                                    |                  |
| <i>daf-2(e1370)</i><br>Hypodermis/ <i>hsf-1</i> RNAi  | 31.4±1.0 | 41 | -14%                            | 94/120 | 0.0013                             |                  |
| <i>daf-2(e1370)</i><br>Hypodermis/ <i>daf-16</i> RNAi | 31.9±1.2 | 41 | -12%                            | 95/110 | <0.0001                            |                  |
| <i>daf-2(e1370)</i><br>Hypodermis/control<br>RNAi     | 40.1±1.0 | 48 |                                 | 87/120 |                                    |                  |
| <i>daf-2(e1370)</i><br>Hypodermis/ <i>hsf-1</i> RNAi  | 26.4±0.6 | 31 | -34%                            | 88/120 | <0.0001                            |                  |
| <i>daf-2(e1370)</i><br>Hypodermis/ <i>daf-16</i> RNAi | 34.1±1.1 | 41 | -15%                            | 72/119 | <0.0001                            |                  |
| <i>daf-2(e1370); rde-1(ne219)</i> /control RNAi       | 38.3±0.8 | 47 |                                 | 79/120 |                                    |                  |
| <i>daf-2(e1370); rde-1(ne219)/hsf-1</i> RNAi          | 35.0±1.0 | 44 | -9%                             | 87/120 | 0.0121                             |                  |
| <i>daf-2(e1370); rde-1(ne219)/daf-16</i> RNAi         | 34.9±1.0 | 44 | -9%                             | 93/120 | 0.0082                             |                  |
| <i>daf-2(e1370); rde-1(ne219)</i> /control RNAi       | 33.0±0.7 | 38 |                                 | 54/120 |                                    |                  |
| <i>daf-2(e1370); rde-1(ne219)/hsf-1</i> RNAi          | 32.8±0.8 | 38 | 0%                              | 65/120 | 0.8162                             |                  |
| <i>daf-2(e1370); rde-1(ne219)/daf-16</i> RNAi         | 30.4±0.8 | 38 | -8%                             | 56/120 | 0.0359                             |                  |
| Muscle/control RNAi                                   | 15.9±0.4 | 19 |                                 | 96/160 |                                    | Fig. S7C,<br>S7D |
| Muscle/ <i>hsf-1</i> RNAi                             | 16.5±0.5 | 22 | 4%                              | 74/160 | 0.1072                             | Fig. S7C         |
| Muscle/ <i>daf-16</i> RNAi                            | 15.6±0.4 | 19 | -2%                             | 84/160 | 0.6293                             | Fig. S7D         |
| <i>daf-2(e1370)</i><br>Muscle/control RNAi            | 37.6±0.9 | 46 | 137%                            | 86/160 | <0.0001                            | Fig. S7C,<br>S7D |
| <i>daf-2(e1370)</i> Muscle/ <i>hsf-1</i> RNAi         | 28.7±1.1 | 37 | -24% <sup><i>daf-2(-)</i></sup> | 75/160 | <0.0001 <sup><i>daf-2(-)</i></sup> | Fig. S7C         |
| Muscle/ <i>daf-16</i> RNAi                            | 25.9±0.8 | 31 | -31% <sup><i>daf-2(-)</i></sup> | 77/160 | <0.0001 <sup><i>daf-2(-)</i></sup> | Fig. S7D         |

|                                               |          |    |                                 |         |                                    |  |
|-----------------------------------------------|----------|----|---------------------------------|---------|------------------------------------|--|
| Muscle/control RNAi                           | 11.0±0.2 | 16 |                                 | 124/160 |                                    |  |
| Muscle/ <i>hsf-1</i> RNAi                     | 11.4±0.2 | 16 | 4%                              | 81/160  | 0.2086                             |  |
| Muscle/ <i>daf-16</i> RNAi                    | 11.1±0.3 | 16 | 1%                              | 100/151 | 0.5596                             |  |
| <i>daf-2(e1370)</i><br>Muscle/control RNAi    | 28.9±1.0 | 37 | 163%                            | 102/160 | <0.0001                            |  |
| <i>daf-2(e1370)</i> Muscle/ <i>hsf-1</i> RNAi | 22.4±0.6 | 23 | -22% <sup><i>daf-2(-)</i></sup> | 126/160 | <0.0001 <sup><i>daf-2(-)</i></sup> |  |
| Muscle/ <i>daf-16</i> RNAi                    | 23.5±0.9 | 28 | -19% <sup><i>daf-2(-)</i></sup> | 69/160  | 0.0001 <sup><i>daf-2(-)</i></sup>  |  |

Lifespan data within solid lines are the same experimental sets.

*p* values were calculated within the sets by using the log-rank (Mantel-Cox) method.

Percent (%) changes and *p* values were calculated with each control that is located in the first row within the solid line. The other comparisons used for calculating % changes and *p* values were indicated as superscripts.

Number of animals that died indicates the number of worms that counted as dead, and total indicates the number of worms that were initially used for our lifespan assays, including censored worms.

**Supplementary Table 7. List of potential PFD-6-interacting partners identified from a yeast two-hybrid screen, related to Figure 4**

| Gene         | Description           | Number of Clone (75) | Type of Clone |
|--------------|-----------------------|----------------------|---------------|
| <i>ifc-2</i> | Intermediate filament | 7                    | 4             |

|                      |                               |    |                |
|----------------------|-------------------------------|----|----------------|
| <i>ifd-1</i>         | Intermediate filament         | 10 | 2 <sup>^</sup> |
| <i>ifd-2</i>         | Intermediate filament         | 10 | 4 <sup>^</sup> |
| <i>dsbn-1</i>        | Human dysbindin               | 1  | 1              |
| <i>pfd-5</i>         | Prefoldin subunit 5           | 6  | 4              |
| F35H10.6/ <i>UXT</i> | Protein UXT isoform 1         | 27 | 4              |
| T18D3.7              | TSC22                         | 1  | 1              |
| <i>eef-1B.2</i>      | Translation elongation factor | 1  | 1              |
| R06F6.12             |                               | 3  | 2              |
| B0336.7              | THAP or THAP-like domain      | 7  | 3              |
| <i>col-76</i>        | Collagen                      | 2  | 2 <sup>^</sup> |

<sup>^</sup>: These clones were confirmed by sequencing. The other clones were confirmed by using restriction enzymes.
